# Supplementary material for: IRES-targeting small molecule inhibits enterovirus 71 replication via allosteric stabilization of a ternary complex
Source: PubMed Central journal article supplement (PMC7508794; doi:10.1038/s41467-020-18594-3), 2020-09-22

## **IRES-targeting Small Molecule Inhibits Enterovirus 71 Replication via Allosteric Stabilization of a Ternary Complex**

*Jesse Davila-Calderon<sup>1</sup>, Neeraj Patwardhan<sup>2</sup>, Liang-Yuan-Chiu<sup>1</sup>, Andrew Sugarman<sup>1</sup>, Zhengguo Cai<sup>2</sup>, Srinivasa R. Penutmutchu<sup>1</sup>, Mei-Ling Li<sup>3</sup>, Gary Brewer<sup>3\*</sup>, Amanda E. Hargrove<sup>2\*</sup> and Blanton S. Tolbert<sup>1\*</sup>*

Department of Chemistry, Case Western Reserve University, Cleveland, OH

Department of Chemistry, Duke University, Durham, NC

Department of Biochemistry and Molecular Biology, Rutgers Robert Wood Johnson Medical School, Piscataway, NJ

\*email: [blanton.tolbert@case.edu](mailto:blanton.tolbert@case.edu) or [Amanda.hargrove@duke.edu](mailto:Amanda.hargrove@duke.edu) or [brewerga@rwjms.rutgers.edu](mailto:brewerga@rwjms.rutgers.edu)

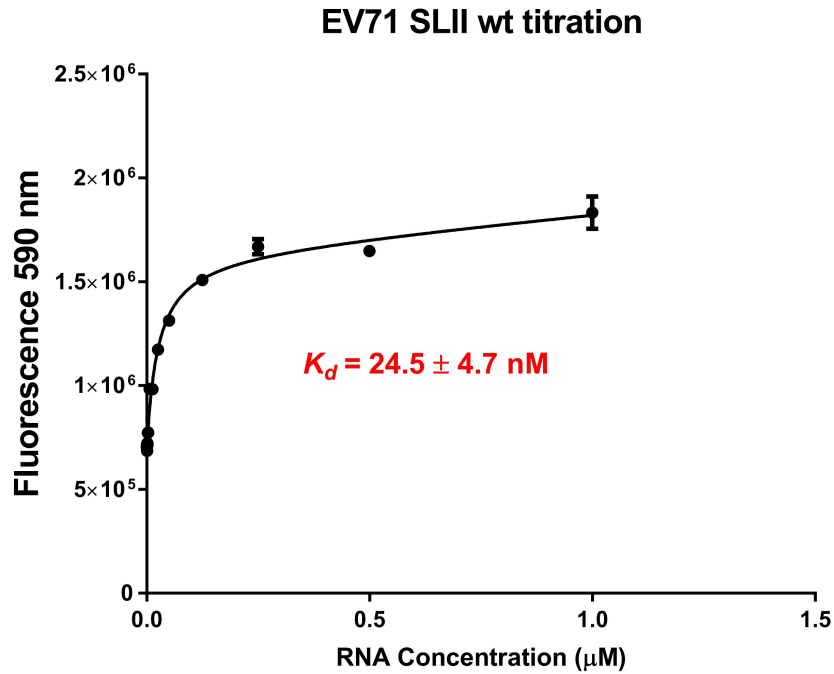

**Supplementary Figure 1.** Binding assay for Tat peptide to SLII. 60 nM Tat peptide was titrated with EV71 SLII RNA (0~1  $\mu\text{M}$ ). Buffer: 50 mM Tris, 50 mM KCl, 0.01% Triton-X-100, 5% DMSO, pH = 7.4. Data are presented as mean values  $\pm$  SEM and measured from 3 technical replicates over 3 biological replicates (n=9 for SEM calculation).

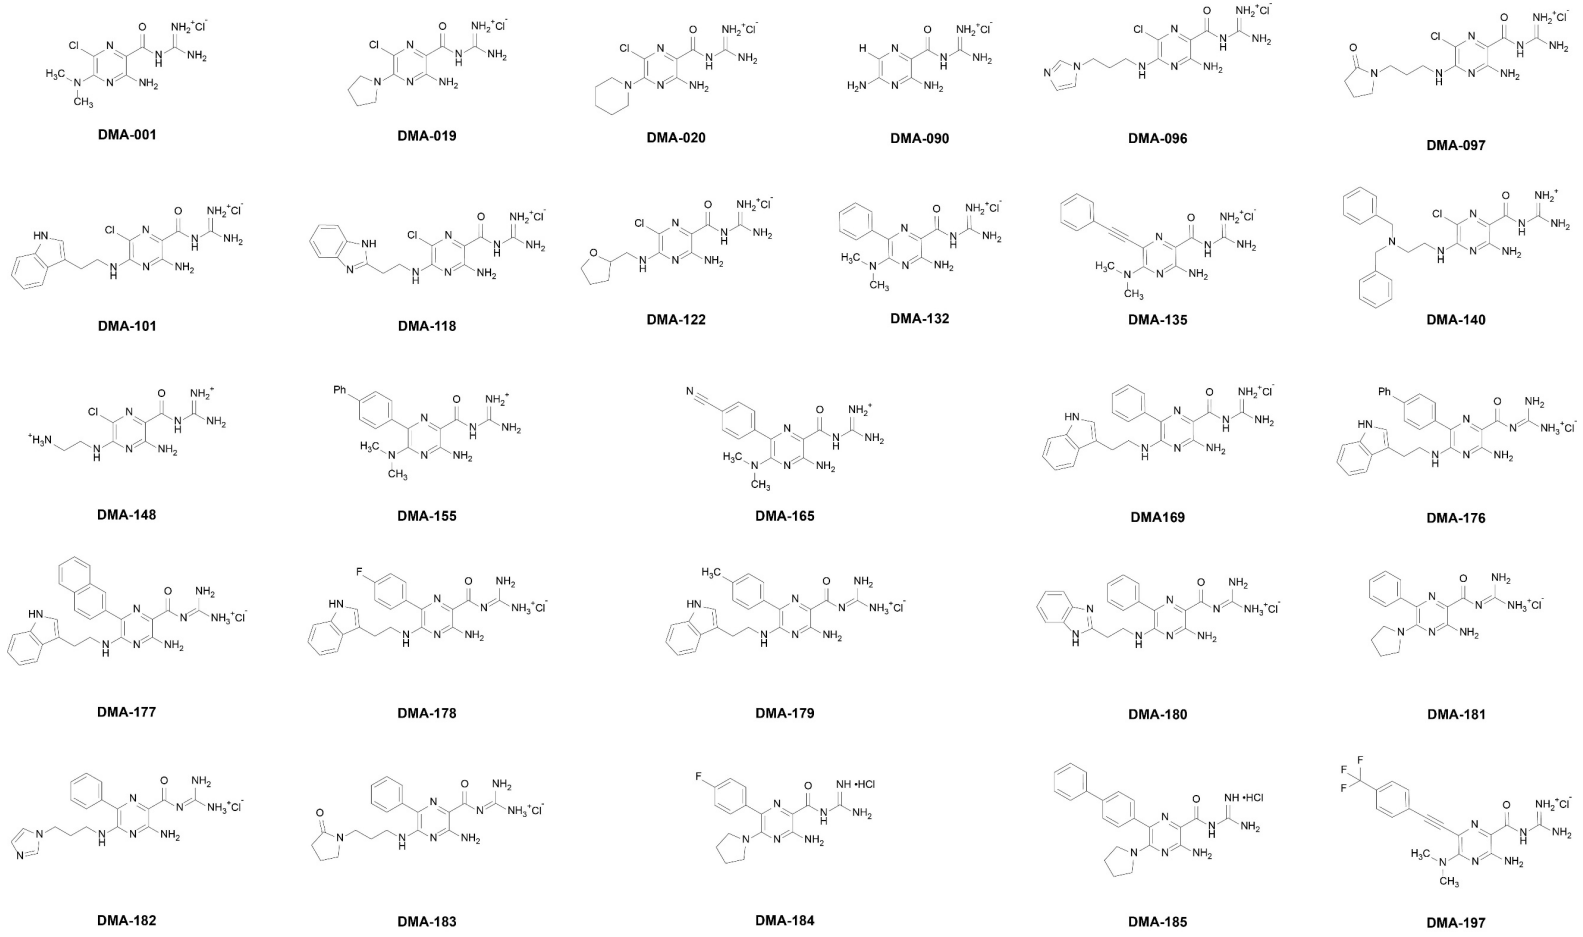

**Supplementary Figure 2.** Structures of amiloride derivatives utilized in this study

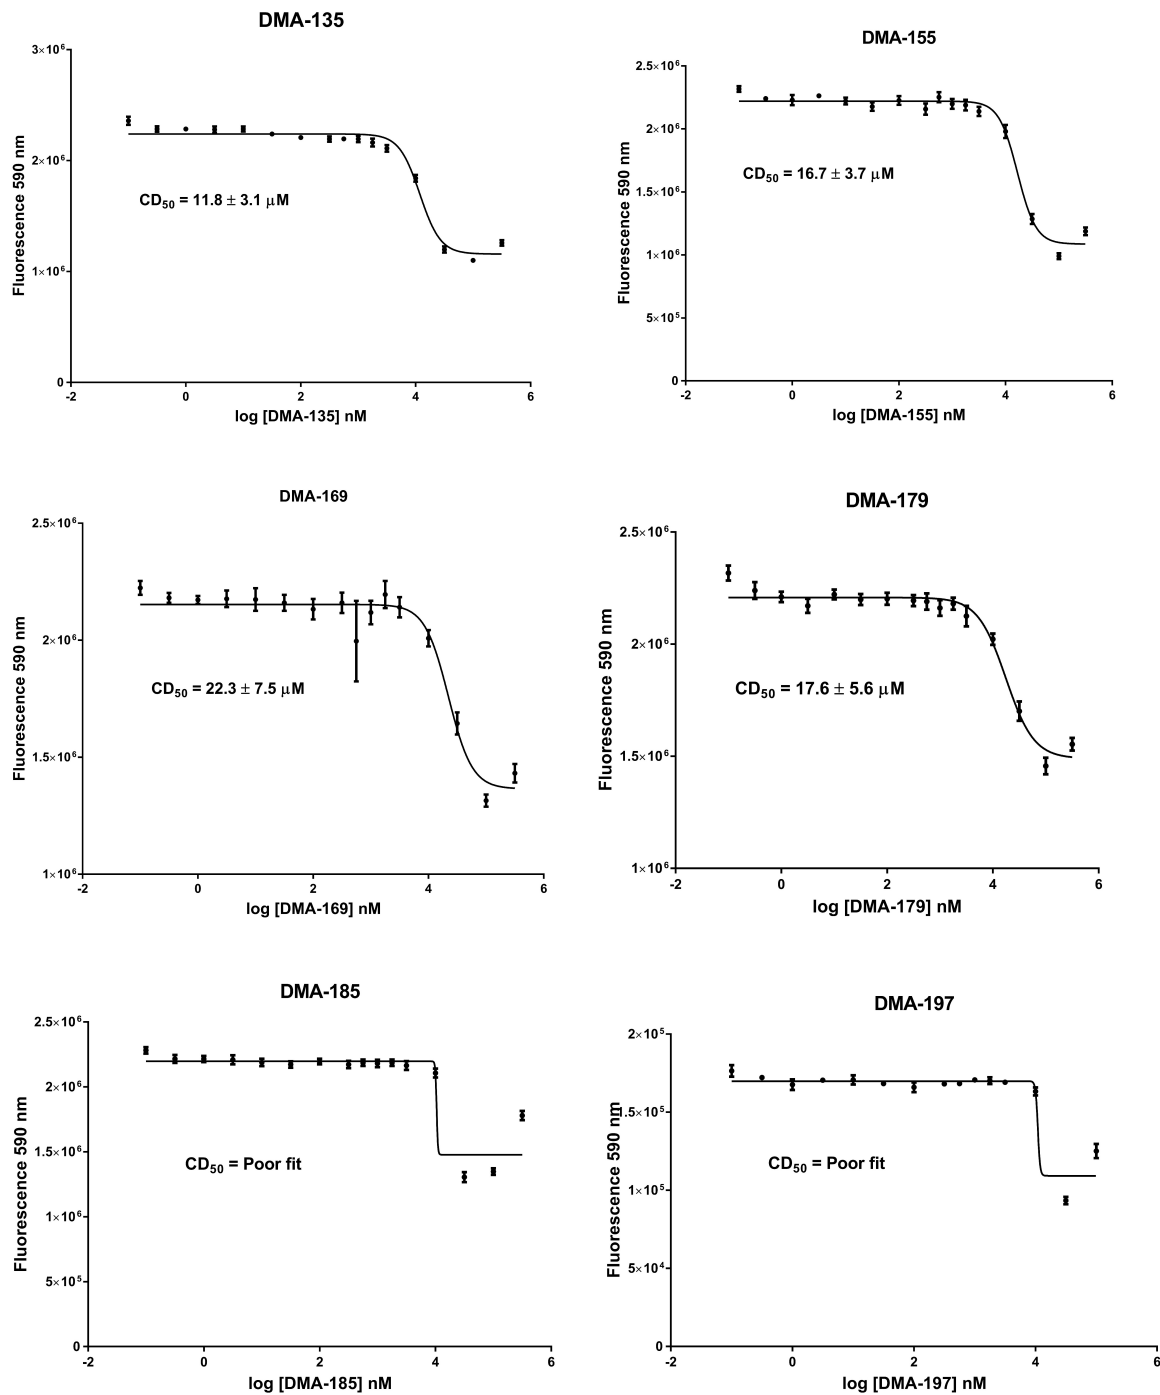

**Supplementary Figure 3.** Full binding curves of amiloride molecules vs EV71 SLII RNA. [Tat peptide] = 60 nM, [EV71 SLII] = 90 nM, log[DMA]/nM = -1~5.5 (data point was deleted for DMA-197 at highest concentration due to small molecule precipitation), buffer: 50 mM Tris, 50 mM KCl, 0.01% Triton-X-100, 5% DMSO, pH = 7.4. Data are presented as mean values +/- SEM and measured from 3 technical replicates over 3 biological replicates (n=9 for SEM calculation). Specifically, DMA-197 were measured from 3 technical replicates over 2 biological replicates due to data export issue, so N=6 for this compound.

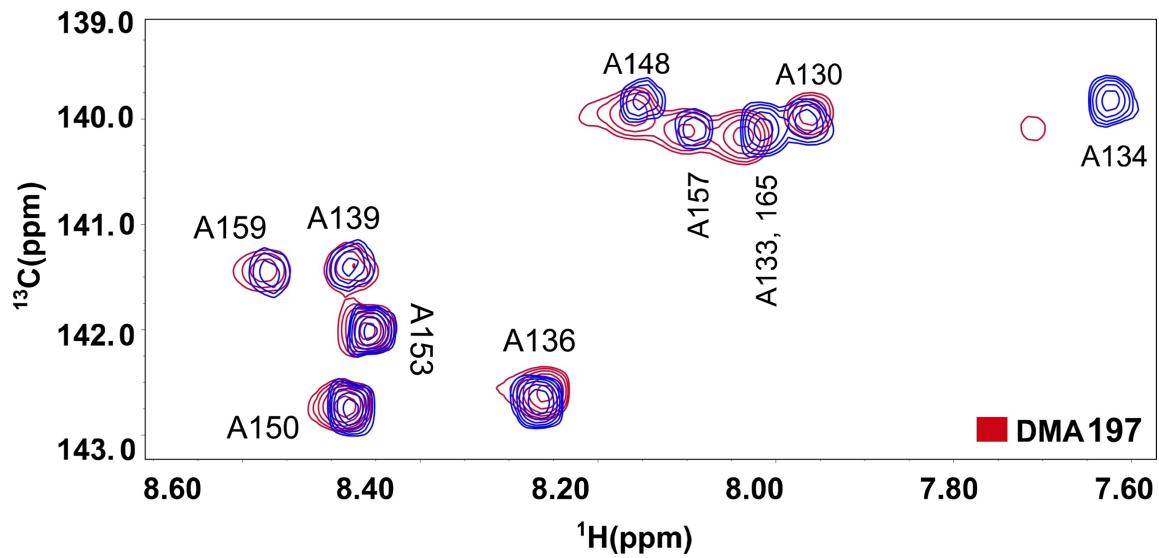

**Supplementary Figure 4.** Single-point  $^1\text{H}$ - $^{13}\text{C}$  TROSY HSQC titrations of A( $^{13}\text{C}$ )-selectively labeled SLII constructs with DMA-197 at 5-fold excess

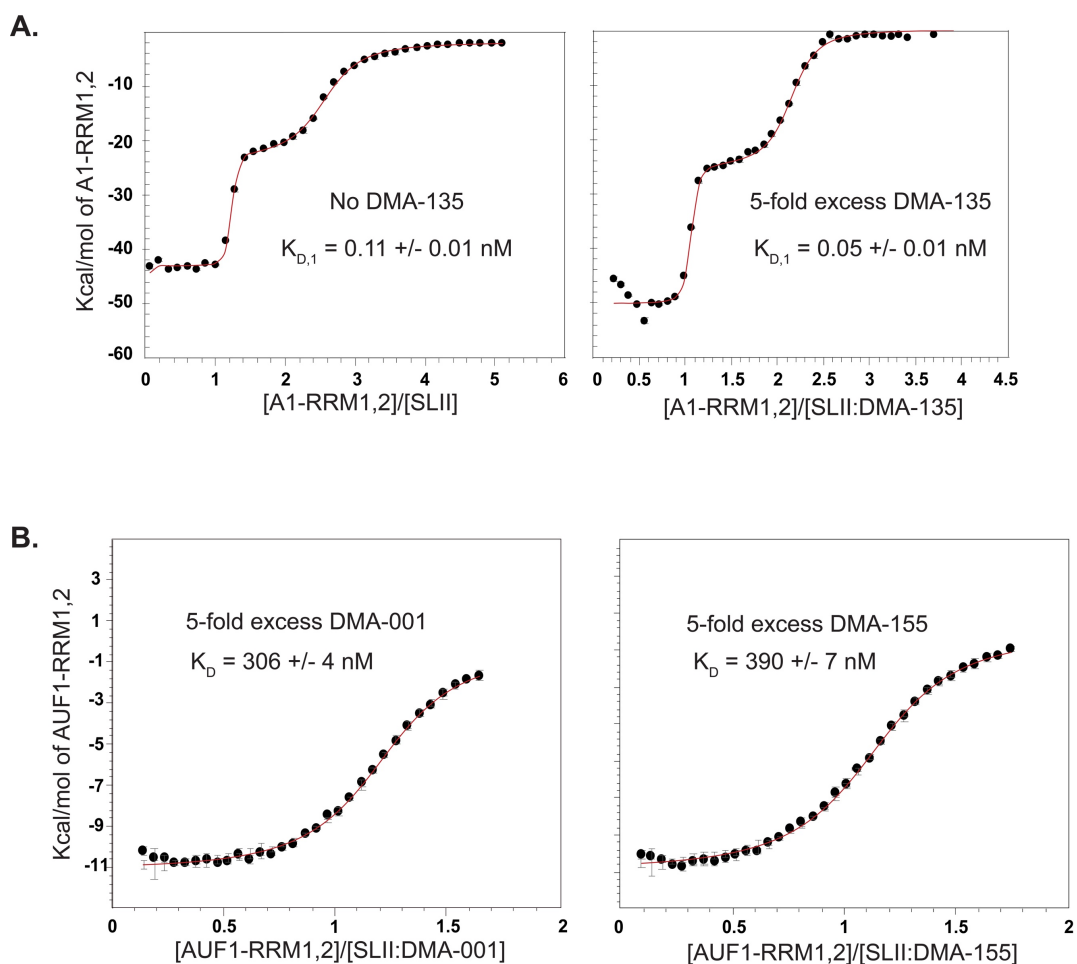

**Supplementary Figure 5.** (A) Calorimetric titrations of A1-RRM1,2 into free SLII (left) and the SLII-(DMA-135) complex prepared at a 1:5 molar ratio. (B) Calorimetric titrations of AUF1-RRM1,2 into (left) SLII-(DMA-001) and (right) SLII-(DMA-155) each prepared at a 1:5 molar ratio. The experiments were performed in 10 mM K<sub>2</sub>HPO<sub>4</sub>, 20 mM KCl, 0.5 mM EDTA, and 4 mM DTT (pH 6.5) buffer at 298 K. Data represented as mean  $\pm$  SD of  $n=2$  experimental replicates. Uncertainties in individual binding isotherms are calculated using Affinimeter and are determined by considering the noise and quality of raw data and the dispersion of the integrated signal as a function of concentration.

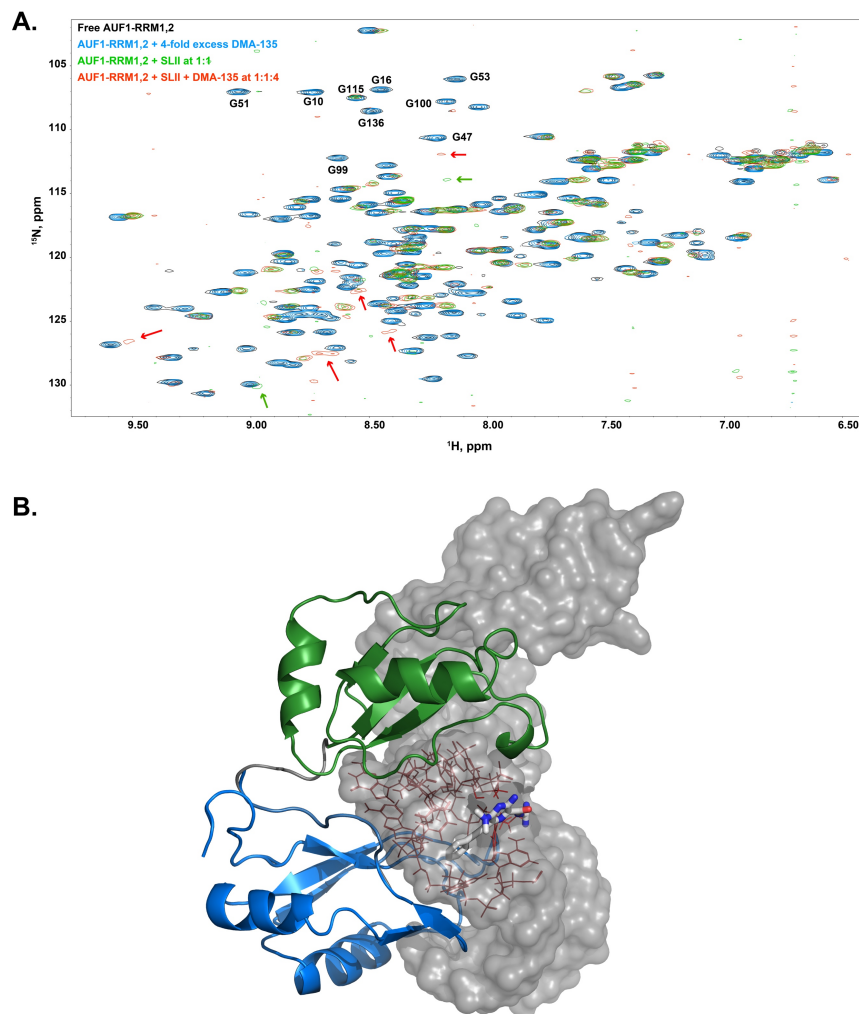

**Supplementary Figure 6.** (A) Single-point  $^1\text{H}$ - $^{15}\text{N}$  HSQC titrations of  $^{15}\text{N}$ -labeled AUF1-RRM1,2 (black) with excess DMA-135 (blue); with SLII added at a 1:1 molar ratio (green); or with the SLII-(DMA-135) complex prepared at a 1:4 molar ratio (red). Red arrows indicate new correlation peaks only observed in the presence of SLII-(DMA-135). (B) Structural model of the AUF1,2-SLII-(DMA-135) ternary complex. The structural model was calculated in HADDOCK using the observed AUF1-RRM1,2 chemical shift perturbations as docking restraints. The structure of AUF1-RRM1,2 is a preliminary solution NMR structure that will be described elsewhere.

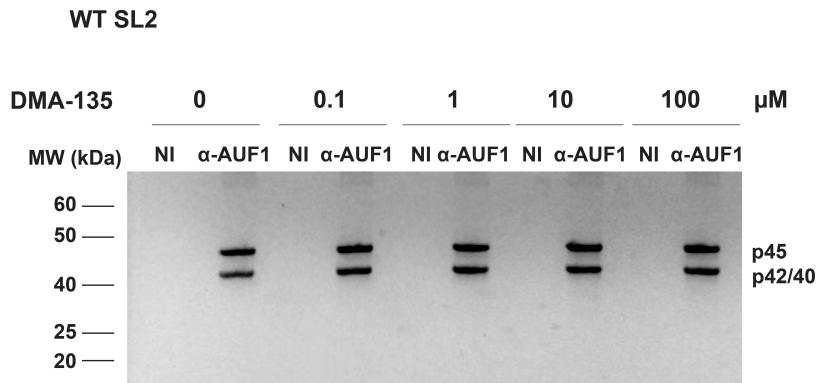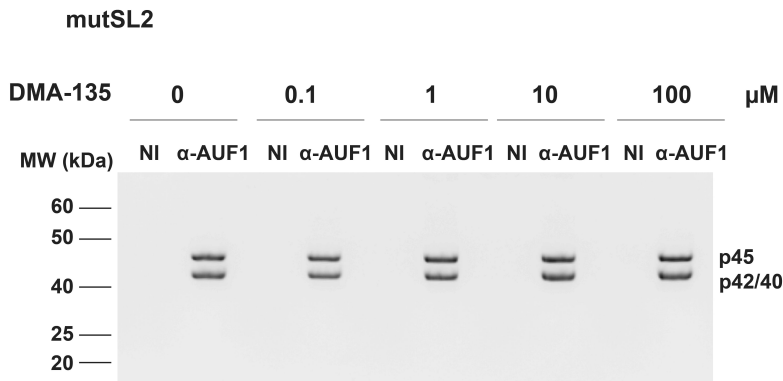

**Supplementary Figure 7.** Aliquots of samples immunoprecipitated with either anti-AUF1 or non-immune serum (N.I.) from Figure 7C were analyzed by Western blot to verify anti-AUF1-dependent recovery of AUF1. Western blot analysis was performed for one complete RIP experiment since the three replicate experiments yielded similar quantitative RT-PCR results. The specific AUF1 isoforms are indicated. Note that immunoprecipitation using N.I. serum did not precipitate AUF1, as expected. Uncropped blot images are provided as source data.



**Supplementary Table 1.** CD<sub>50</sub> values for a selected set of small molecules

| <b>Molecule</b> | <b>CD<sub>50</sub> (μM)</b> |
|-----------------|-----------------------------|
| DMA-135         | 11.8 ± 3.1                  |
| DMA-155         | 16.7 ± 3.7                  |
| DMA-169         | 22.3 ± 7.5                  |
| DMA-178         | 17.6 ± 5.6                  |
| DMA-185         | Poor Fit                    |

**Supplementary Table 2.** Summary of thermodynamic parameters for DMA-SLII and AUF1-SLII-(DMA-135) interactions.

| <b>System</b>                 | <b><math>\Delta G</math><br/>(kcal/mol)</b> | <b><math>\Delta H</math><br/>(kcal/mol)</b> | <b><math>-T\Delta S</math><br/>(kcal/mol)</b> | <b><math>K_D</math> (nM)</b> |
|-------------------------------|---------------------------------------------|---------------------------------------------|-----------------------------------------------|------------------------------|
| SLII to DMA-001               | $-8.6 \pm 0.4$                              | $12.8 \pm 3$                                | $-21.4 \pm 2$                                 | $584 \pm 62$                 |
| SLII to DMA-135               | $-8.6 \pm 0.1$                              | $12 \pm 1$                                  | $-20.7 \pm 0.4$                               | $525 \pm 98$                 |
| SLII to DMA-155               | $-9.0 \pm 0.1$                              | $11 \pm 5$                                  | $-20 \pm 5$                                   | $271 \pm 59$                 |
| SLII to DMA-169               |                                             |                                             | No Data                                       |                              |
| SLII to DMA-178               |                                             |                                             | No Data                                       |                              |
| SLII to DMA-185               |                                             |                                             | No Data                                       |                              |
| AUF1 to SLII                  | $-8.8 \pm 0.1$                              | $-25.7 \pm 0.7$                             | $16.8 \pm 0.7$                                | $336 \pm 44$                 |
| AUF1 to SLII: DMA-135 (1:1.6) | $-9.0 \pm 0.2$                              | $-11.7 \pm 0.5$                             | $2.7 \pm 0.5$                                 | $240 \pm 72$                 |
| AUF1 to SLII: DMA-135 (1:3.3) | $-9.34 \pm 0.01$                            | $-13.91 \pm 0.04$                           | $4.58 \pm 0.04$                               | $140 \pm 2$                  |
| AUF1 to SLII: DMA-135 (1:5)   | $-9.37 \pm 0.03$                            | $-13.5 \pm 0.2$                             | $4.1 \pm 0.2$                                 | $134 \pm 7$                  |
| AUF1 to SLII: DMA-001 (1:5)   | $-8.88 \pm 0.01$                            | $-10.9 \pm 0.4$                             | $2.1 \pm 0.4$                                 | $306 \pm 4$                  |
| AUF1 to SLII: DMA-155 (1:5)   | $-8.73 \pm 0.01$                            | $-13.11 \pm 0.01$                           | $4.38 \pm 0.02$                               | $390 \pm 7$                  |

**Supplementary Note 1. Characterization data for trifluoromethyl derivative DMA-197. Amino(3-amino-5-(dimethylamino)-6-((4-fluorophenyl)ethynyl)pyrazine-2-carboxamido) methaniminium chloride (DMA-197):**

$^1\text{H}$  NMR (500 MHz, Methanol- $d_4$ )  $\delta$  7.75 – 7.65 (m, 4H), 3.46 – 3.38 (m, 1H, NH), 3.37-3.32 (m, 6H);  $^{13}\text{C}$  NMR (126 MHz, MeOD)  $\delta$  165.5, 157.1, 155.6, 154.2, 131.3, 131.2, 126.7, 125.3, 112.8, 112.2, 90.2, 89.9, 39.4; HRMS (ESI+): Calculated for  $\text{C}_{17}\text{H}_{17}\text{F}_3\text{N}_7\text{O}$   $[\text{M}+\text{H}]^+$ : 392.1441, Found: 392.1448 ( $\pm$  1.6 ppm). HPLC Analysis: Retention time = 7.106 min, Purity = 95.141%.

**$^1\text{H}$  NMR Spectrum for Amino(3-amino-5-(dimethylamino)-6-((4-fluorophenyl)ethynyl)pyrazine-2-carboxamido) methaniminium chloride (DMA-197):**

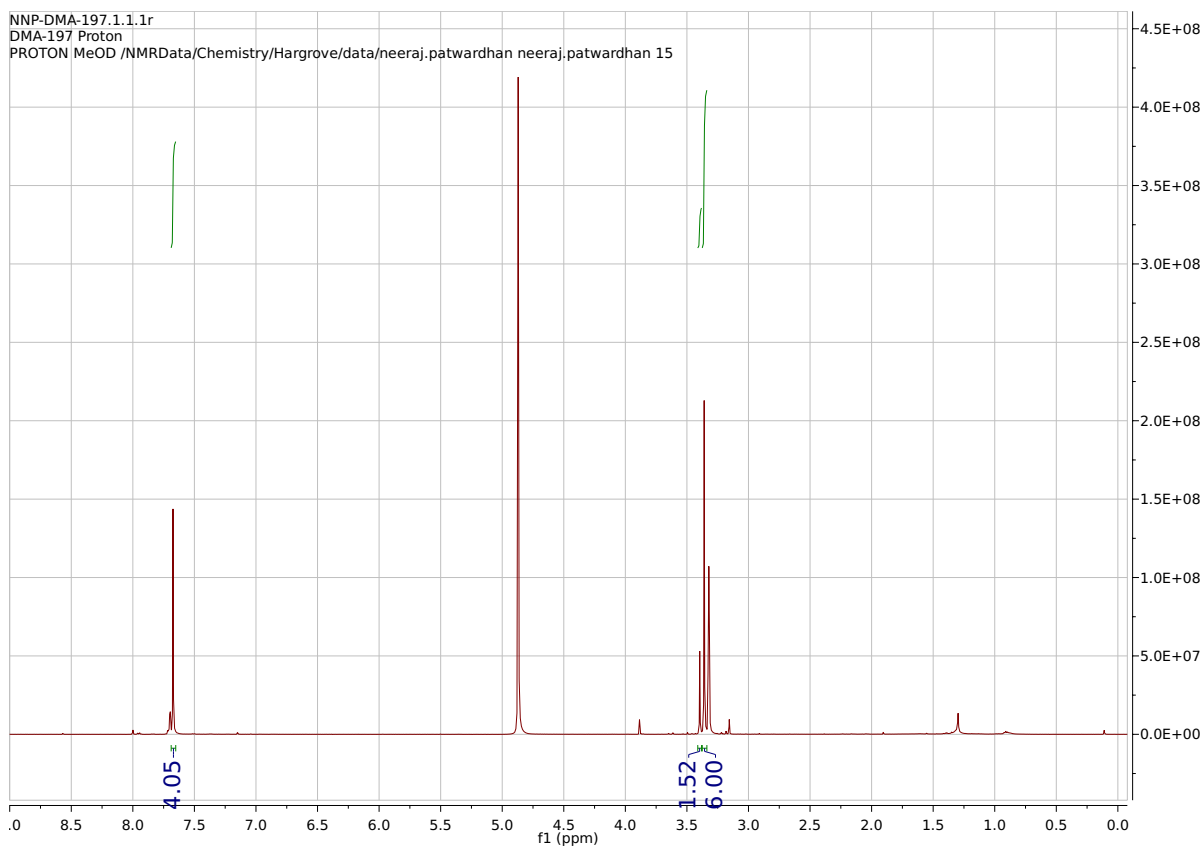

**$^{13}\text{C}$  NMR Spectrum for Amino(3-amino-5-(dimethylamino)-6-((4-fluorophenyl)ethynyl)pyrazine-2-carboxamido) methaniminium chloride (DMA-197):**

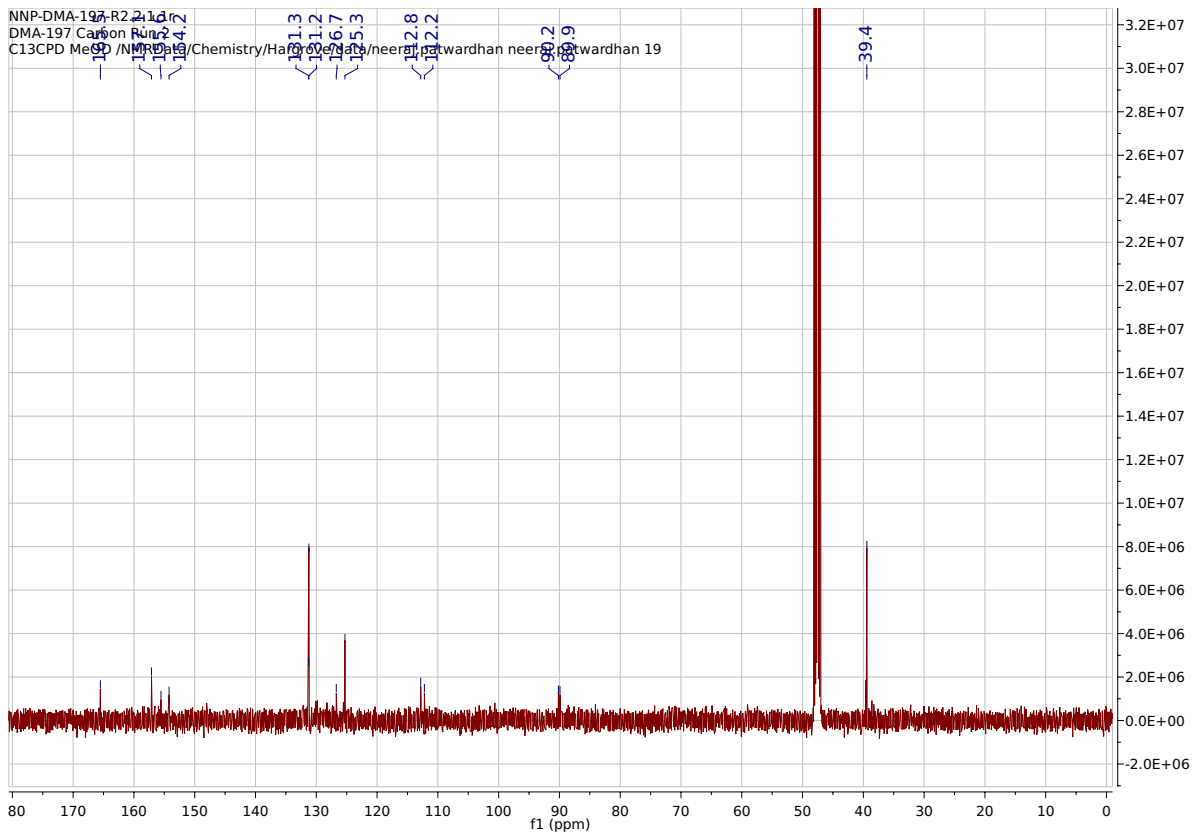

**HPLC Chromatogram for for Amino(3-amino-5-(dimethylamino)-6-((4-fluorophenyl)ethynyl)pyrazine-2-carboxamido) methaniminium chloride (DMA-197):**

## <Sample Information>

Sample Name : NNPIII-129-R1  
 Sample ID : NNPIII-129-R1  
 Data Filename : NNPIII-129-R1.lcd  
 Method Filename : NNP-Grd10-90\_Slow\_PDA\_D2only.lcm  
 Batch Filename : NNP\_04\_22\_19\_R1.lcb  
 Vial # : 1-5  
 Injection Volume : 10 uL  
 Date Acquired : 4/22/2019 11:02:53 AM  
 Date Processed : 4/22/2019 11:25:57 AM  
 Sample Type : Unknown  
 Acquired by : chemist  
 Processed by : chemist

## <Chromatogram>

mAU

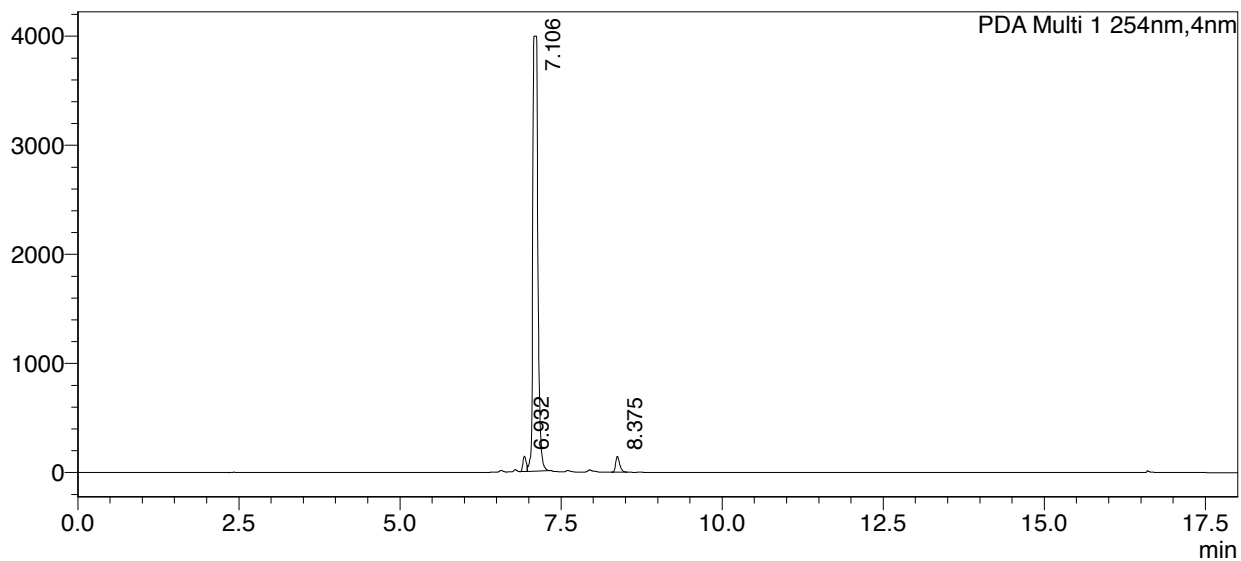

## <Peak Table>

PDA Ch1 254nm

| Peak# | Ret. Time | Area     | Area%   |
|-------|-----------|----------|---------|
| 1     | 6.932     | 497759   | 2.160   |
| 2     | 7.106     | 21925166 | 95.141  |
| 3     | 8.375     | 622086   | 2.699   |
| Total |           | 23045010 | 100.000 |

## Supplementary Note 2. Small molecule screening using the Tat peptide displacement assay

**Z' Scores:** Z' Scores for each RNA: peptide system were calculated using the equation below, using 144 data points for each RNA:peptide complex –

$$Z' = 1 - \left( \frac{3 (\sigma_{\text{positive}} + \sigma_{\text{negative}})}{|\mu_{\text{positive}} - \mu_{\text{negative}}|} \right)$$

$\mu_{\text{positive}}$  = Mean Fluorescence Intensity for peptide + RNA

$\mu_{\text{negative}}$  = Mean Fluorescence Intensity for peptide alone

$\sigma_{\text{positive}}$  = Standard deviation for positive

$\sigma_{\text{negative}}$  = Standard deviation for negative

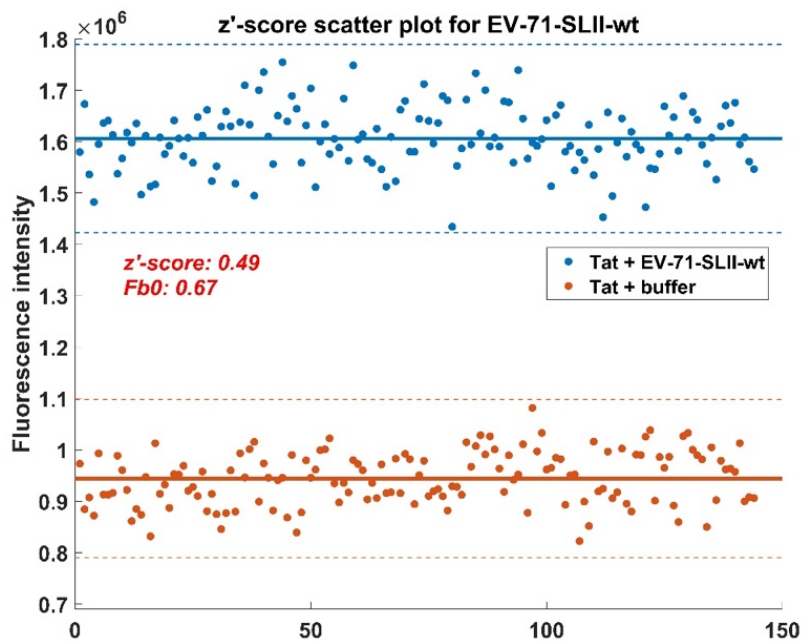

Supplement: 41467_2020_18594_MOESM1_ESM.pdf [file 41467_2020_18594_MOESM1_ESM.pdf]
